# Supplementary material for: Self-amplifying RNA vaccine protects mice against lethal Ebola virus infection
Source: PubMed Central journal article supplement — Mol Ther. 2022 Oct 27;31(2):374–86. doi: 10.1016/j.ymthe.2022.10.011 (PMC9931551; doi:10.1016/j.ymthe.2022.10.011), 2022-10-27
Supplement: mmc1.pdf [file mmc1.pdf]

## **Supplemental Information**

### **Self-amplifying RNA vaccine protects mice against lethal Ebola virus infection**

**Verena Krähling, Stephanie Erbar, Alexandra Kupke, Sara S. Nogueira, Kerstin C. Walzer, Hendrik Berger, Erik Dietzel, Sandro Halwe, Cornelius Rohde, Lucie Sauerhering, Leticia Aragão-Santiago, Jorge Moreno Herrero, Sonja Witzel, Heinrich Haas, Stephan Becker, and Ugur Sahin**

1 **Self-amplifying RNA vaccine protects mice against lethal Ebola virus infection**

2 Verena Krähling\*<sup>1,2</sup>, Stephanie Erbar\*<sup>3</sup>, Alexandra Kupke<sup>1,2</sup>, Sara S. Nogueira<sup>3</sup>, Kerstin C.  
3 Walzer<sup>3</sup>, Hendrik Berger<sup>3</sup>, Erik Dietzel<sup>1,2</sup>, Sandro Halwe<sup>1,2</sup>, Cornelius Rohde<sup>1,2</sup>, Lucie  
4 Sauerhering<sup>1,2</sup>, Letícia Aragão-Santiago<sup>3</sup>, Jorge Moreno Herrero<sup>3</sup>, Sonja Witzel<sup>4</sup>, Heinrich  
5 Haas<sup>3</sup>, Stephan Becker\*<sup>1,2</sup>, Ugur Sahin\*<sup>3</sup>

6 <sup>1</sup> Institute of Virology, Philipps University Marburg, Hans-Meerwein-Str. 2, 35043 Marburg,  
7 Germany

8 <sup>2</sup> German Center for Infection Research (DZIF), Partner site Gießen-Marburg-Langen,  
9 Marburg, Germany

10 <sup>3</sup> BioNTech SE, An der Goldgrube 12, 55131 Mainz, Germany

11 <sup>4</sup> TRON – Translational Oncology at the University Medical Center of the Johannes Gutenberg  
12 University gGmbH, Freiligrathstraße 12, 55131 Mainz, Germany

13 \* These authors contributed equally to this work

## Supplemental Figure 1

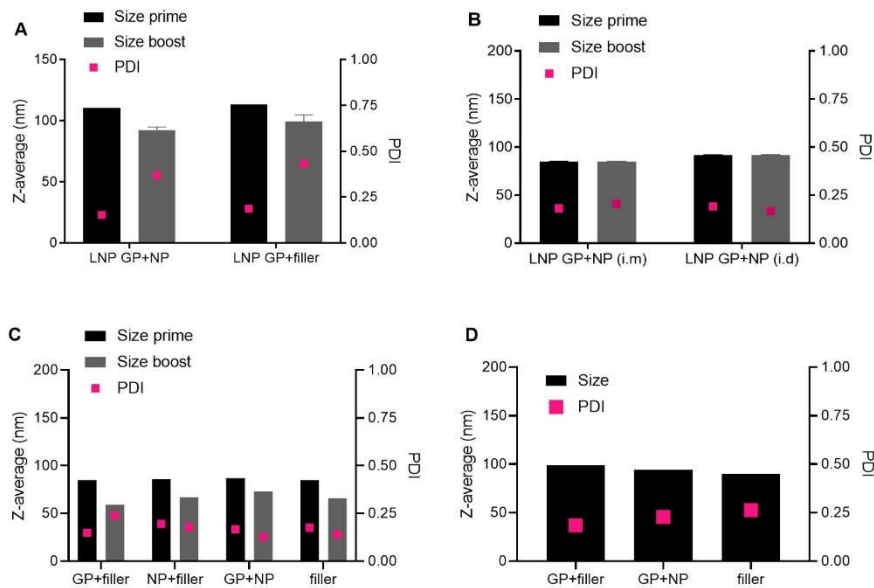

14

15 **Figure S1.** Hydrodynamic diameter (Z-Average) and polydispersity index (PDI) of LNPs used  
16 in the experiments by dynamic Light Scattering (DLS). (A) LNPs co-formulated with GP  
17 saRNA/NP saRNA or GP saRNA/filler RNA showed identical hydrodynamic diameter and  
18 PDI, either in the prime injection or boost injection represented in Figure 2. A measurable  
19 increment of PDI between both formulations used for the boost is accompanied by an overall  
20 reduction in the hydrodynamic diameter. (B) LNPs co-formulated with GP saRNA/NP saRNA  
21 either for i.m or i.d application, depicted in Figure 3, showed identical hydrodynamic diameter  
22 and PDI. (C) No differences could be observed in the hydrodynamic diameter or PDI of the  
23 LNPs after co-formulation of GP saRNA/filler RNA or NP saRNA/filler RNA or GP  
24 saRNA/NP saRNA or filler alone, that were used for the prime or boost injection in the  
25 challenge experiment depicted in Figure 4. (D) LNPs co-formulated with either GP-  
26 saRNA/filler or GP-saRNA/NP-saRNA or filler for the challenge experiment in Figure 5,  
27 showed identical hydrodynamic diameter and PDI.

28

29 **Supplemental Table 1: Evaluation table of clinical scores during challenge experiments**

| <b>Scoring</b>                                                 | <b>0</b>                                                                        | <b>1</b>                                                                           | <b>5</b>                                                                                           | <b>10</b>                                                                                                                                       |
|----------------------------------------------------------------|---------------------------------------------------------------------------------|------------------------------------------------------------------------------------|----------------------------------------------------------------------------------------------------|-------------------------------------------------------------------------------------------------------------------------------------------------|
| <b>Body weight (deviation from average individual weight*)</b> | 0 % – 5 %                                                                       | 6 % – 10 %                                                                         | 11 % – 15 %                                                                                        | > 15 %                                                                                                                                          |
| <b>General condition</b>                                       | Fur smooth, shiny; Orifices clean; Eyes clear; no deviation in body temperature | Fur slightly ruffled, poor or excessive grooming; no deviation in body temperature | Fur dull, disordered; unkempt orifices; Eyes cloudy; Deviation of the body temperature up to 1 ° C | Focally sticky or shaggy, rough fur; Eyes cloudy; Diarrhea; Jaundice or evidence of coagulopathy; Deviation of the body temperature up to 2 ° C |
| <b>Spontaneous behaviour</b>                                   | Normal behaviour (sleeping, reacting to touch, curiosity, social contact)       | Minor deviations from normal behaviors                                             | Moderate changes in activity (hyperactivity / hypoactivity)                                        | Severe activity changes or lethargy; Self-isolation, aggressive behavior towards oneself or cage mates                                          |

\*The average individual body weight was determined by measuring on three different days before the experiment.

The score in the three different categories (body weight, general condition and spontaneous behaviour) for each animal is summed up and animals were euthanized when they reached a score of 10, i.e. the evaluation in one of the criteria body weight, general condition and spontaneous behaviour with a score of 10 was sufficient for euthanasia. If, by adding up the results of the various criteria, a score of 10 on a single day or 6 on two consecutive days was obtained, the veterinarian was consulted to decide on the euthanasia.

31 **Supplemental Table 2: Peptides used in ELISpot assays**

| <b>Peptide name</b>           | <b>Amino acid sequence</b> |
|-------------------------------|----------------------------|
| Peptides derived from EBOV GP |                            |
| MHC class I                   |                            |
| GP MHC-I 1                    | FEVDNLTYV                  |
| GP MHC-I 2                    | MASENSSAM                  |
| GP MHC-I 3                    | FSILNRKAI                  |
| GP MHC-I 4                    | DNLTYVQL                   |
| GP MHC-I 5                    | AFFLYDRL                   |
| GP MHC-I 6                    | ELRTFSIL                   |
| MHC class II                  |                            |
| GP MHC-II 1                   | GLAWIPYFGPAAEGI            |
| GP MHC-II 2                   | KRWGFRSGVPPKVVN            |
| Peptides derived from EBOV NP |                            |
| MHC class I                   |                            |
| NP MHC-I 1                    | YQVNNLEEI                  |
| NP MHC-I 2                    | ARLLNLSGV                  |
| NP MHC-I 3                    | DGVKRLEEL                  |
| MHC class II                  |                            |
| NP MHC-II 1                   | EVNSFAKALSSLAKH            |
| NP MHC-II 2                   | TSNRTPVAPPAPVY             |

32
